# Supplementary material for: Trojan pH-Sensitive Polymer Particles Produced in a Continuous-Flow Capillary Microfluidic Device Using Water-in-Oil-in-Water Double-Emulsion Droplets
Source: MDPI journal article supplement (doi:10.3390/mi13060878), 2022-05-31
Supplement: s1 [file s1]

Supplementary Materials

# Trojan pH-Sensitive Polymer Particles Produced in a Continuous-Flow Capillary Microfluidic Device Using Water-in-Oil-in-Water Double-Emulsion Droplets

Ane Larrea <sup>1</sup>, Manuel Arruebo <sup>1,2,3</sup>, Christophe A. Serra <sup>4,\*</sup> and Victor Sebastián <sup>1,2,3,5,\*</sup>

<sup>1</sup> Instituto de Nanociencia y Materiales de Aragón (INMA), CSIC-Universidad de Zaragoza, 50009 Zaragoza, Spain; larrea@unizar.es (A.L.); arruebom@unizar.es (M.A.)

<sup>2</sup> Department of Chemical Engineering, Campus Río Ebro-Edificio I+D, University of Zaragoza, C/Poeta Mariano Esquillor S/N, 50018 Zaragoza, Spain

<sup>3</sup> Networking Research Center on Bioengineering, Biomaterials and Nanomedicine, CIBER-BBN, 28029 Madrid, Spain

<sup>4</sup> Université de Strasbourg, CNRS, ICS UPR 22, F-67000 Strasbourg, France

<sup>5</sup> Laboratorio de Microscopías Avanzadas, Universidad de Zaragoza, 50018 Zaragoza, Spain

\* Correspondence: ca.serra@unistra.fr (C.A.S.); victorse@unizar.es (V.S.)

**Citation:** Larrea, A.; Arruebo, M.; Serra, C.A.; Sebastián, V. Trojan pH-Sensitive Polymer Particles Produced in a Continuous-Flow Capillary Microfluidic Device Using Water-in-Oil-in-Water Double-Emulsion Droplets. *Micromachines* **2022**, *13*, 878. <https://doi.org/10.3390/mi13060878>

Academic Editor(s): Zebing Mao, Jin Xie and Hong Ding.

Received: date

Accepted: date

Published: 31 May 2022

**Publisher's Note:** MDPI stays neutral with regard to jurisdictional claims in published maps and institutional affiliations.

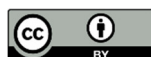

**Copyright:** © 2022 by the authors. Licensee MDPI, Basel, Switzerland. This article is an open access article distributed under the terms and conditions of the Creative Commons Attribution (CC BY) license (<https://creativecommons.org/licenses/by/4.0/>).

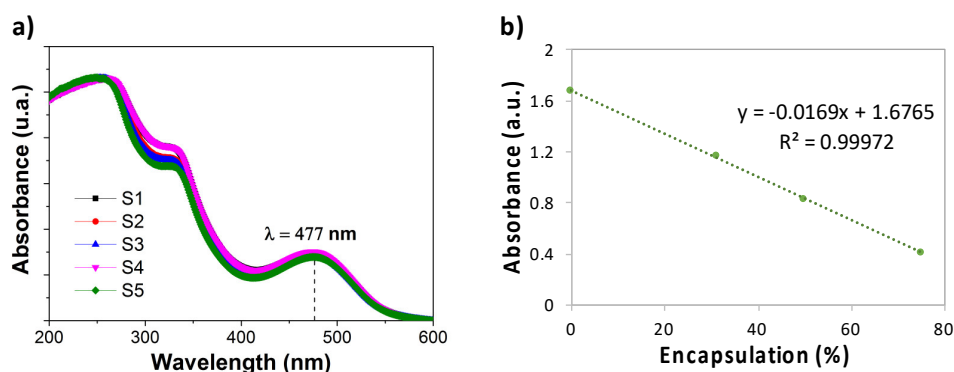

**Figure S1.** (a) UV-Vis spectra of the NPs released in five different samples of Trojan microparticles. (b) Linear fit obtained from the calibration of PLGA-Rifampicin NPs for determination of %Encapsulation.

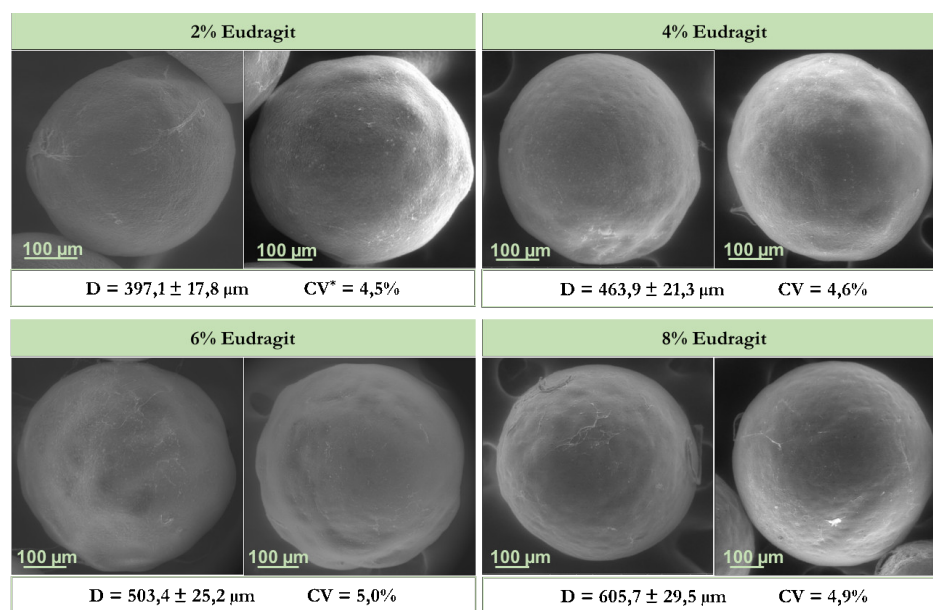

**Figure S2.** Characterization of the enteric microparticles synthesized in the coaxial microfluidic system with different concentrations of Eudragit.  $Q_i/Q_m/Q_o = 5/10/400 \mu\text{l/min}$ . \* CV is the ratio between the standard deviation and the average diameter.
